# Supplementary material for: Enantioselective total synthesis of pyrinodemin A
Source: Royal Society of Chemistry journal article supplement (doi:10.1039/b800840j), 2008-01-01

## Enantioselective Total Synthesis of (-)-Pyrinodemin A

Annie Pouilhès,<sup>[a]</sup> Anel Florès Amado,<sup>[a]</sup> Anne Vidal,<sup>[a]</sup> Yves Langlois,<sup>[a]</sup> Cyrille Kouklovsky\*<sup>[a]</sup>

### Supplementary material

- <sup>1</sup>H NMR spectrum of synthetic pyrinodemin A **1**
- <sup>13</sup>C NMR spectrum of synthetic pyrinodemin A **1**
- <sup>13</sup>C NMR spectrum of synthetic pyrinodemin A **1** recorded at 60 °C
- HSQC spectrum of synthetic pyrinodemin A **1**

# 1H NMR spectrum of synthetic pyrinodemin A 1

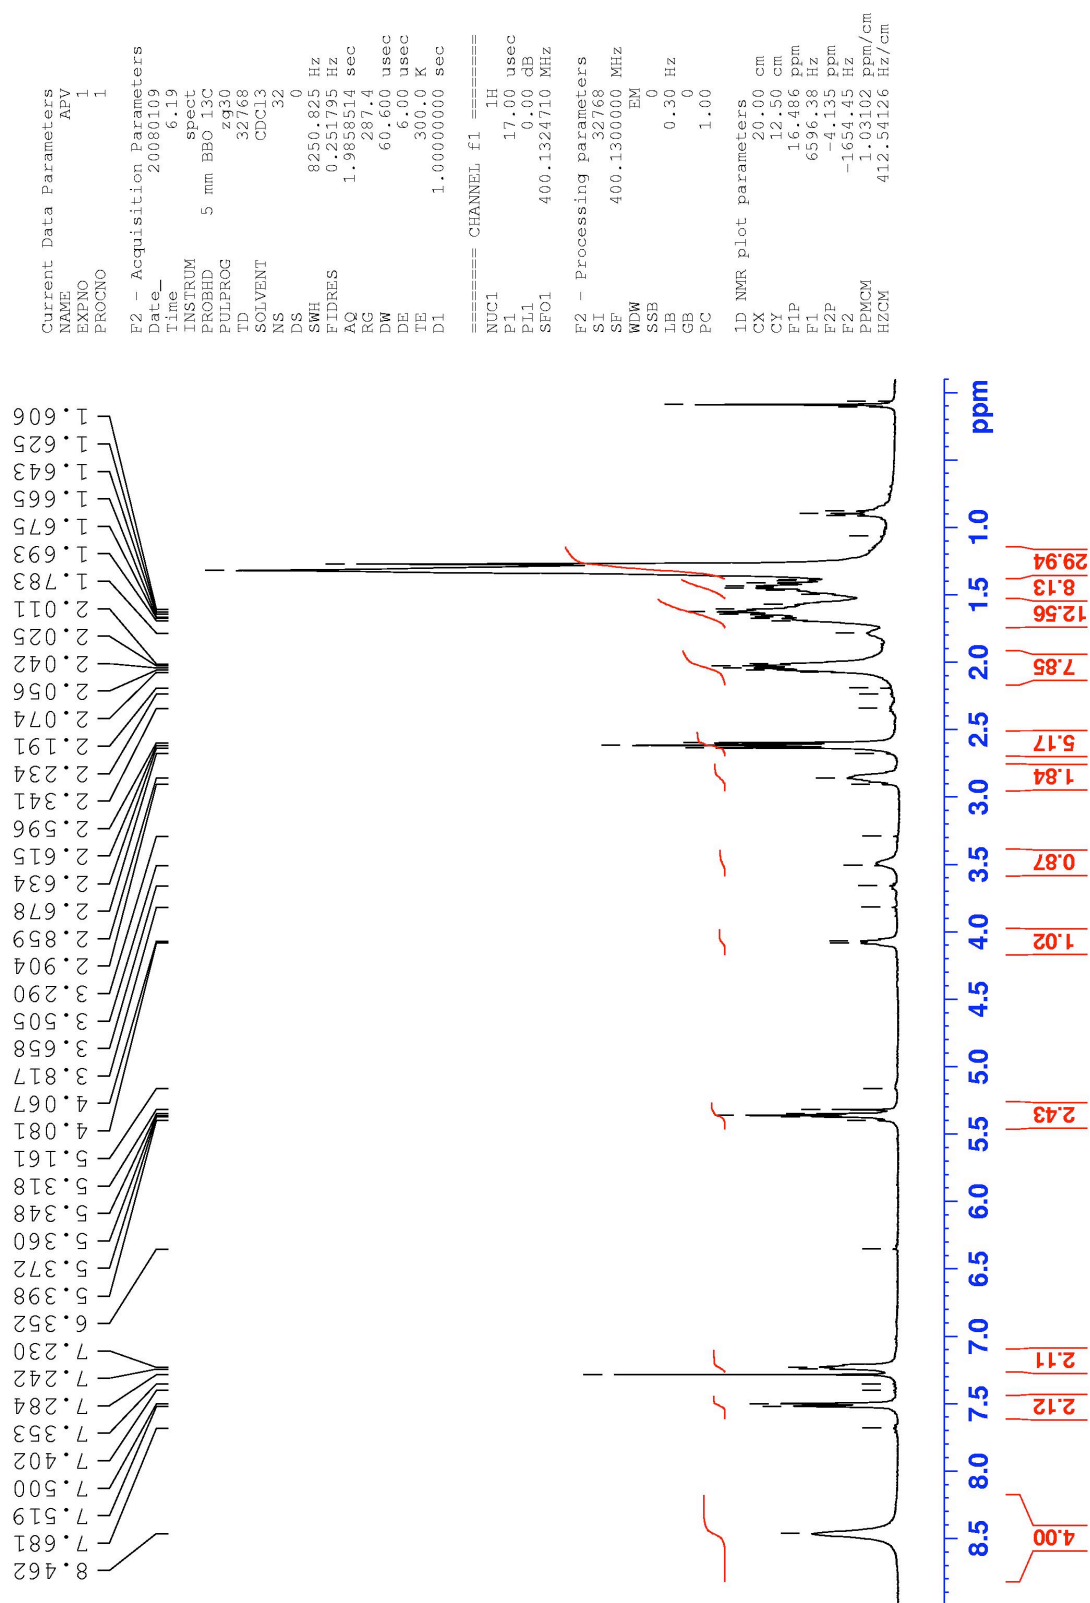

• <sup>13</sup>C NMR spectrum of synthetic pyrinodemin A 1

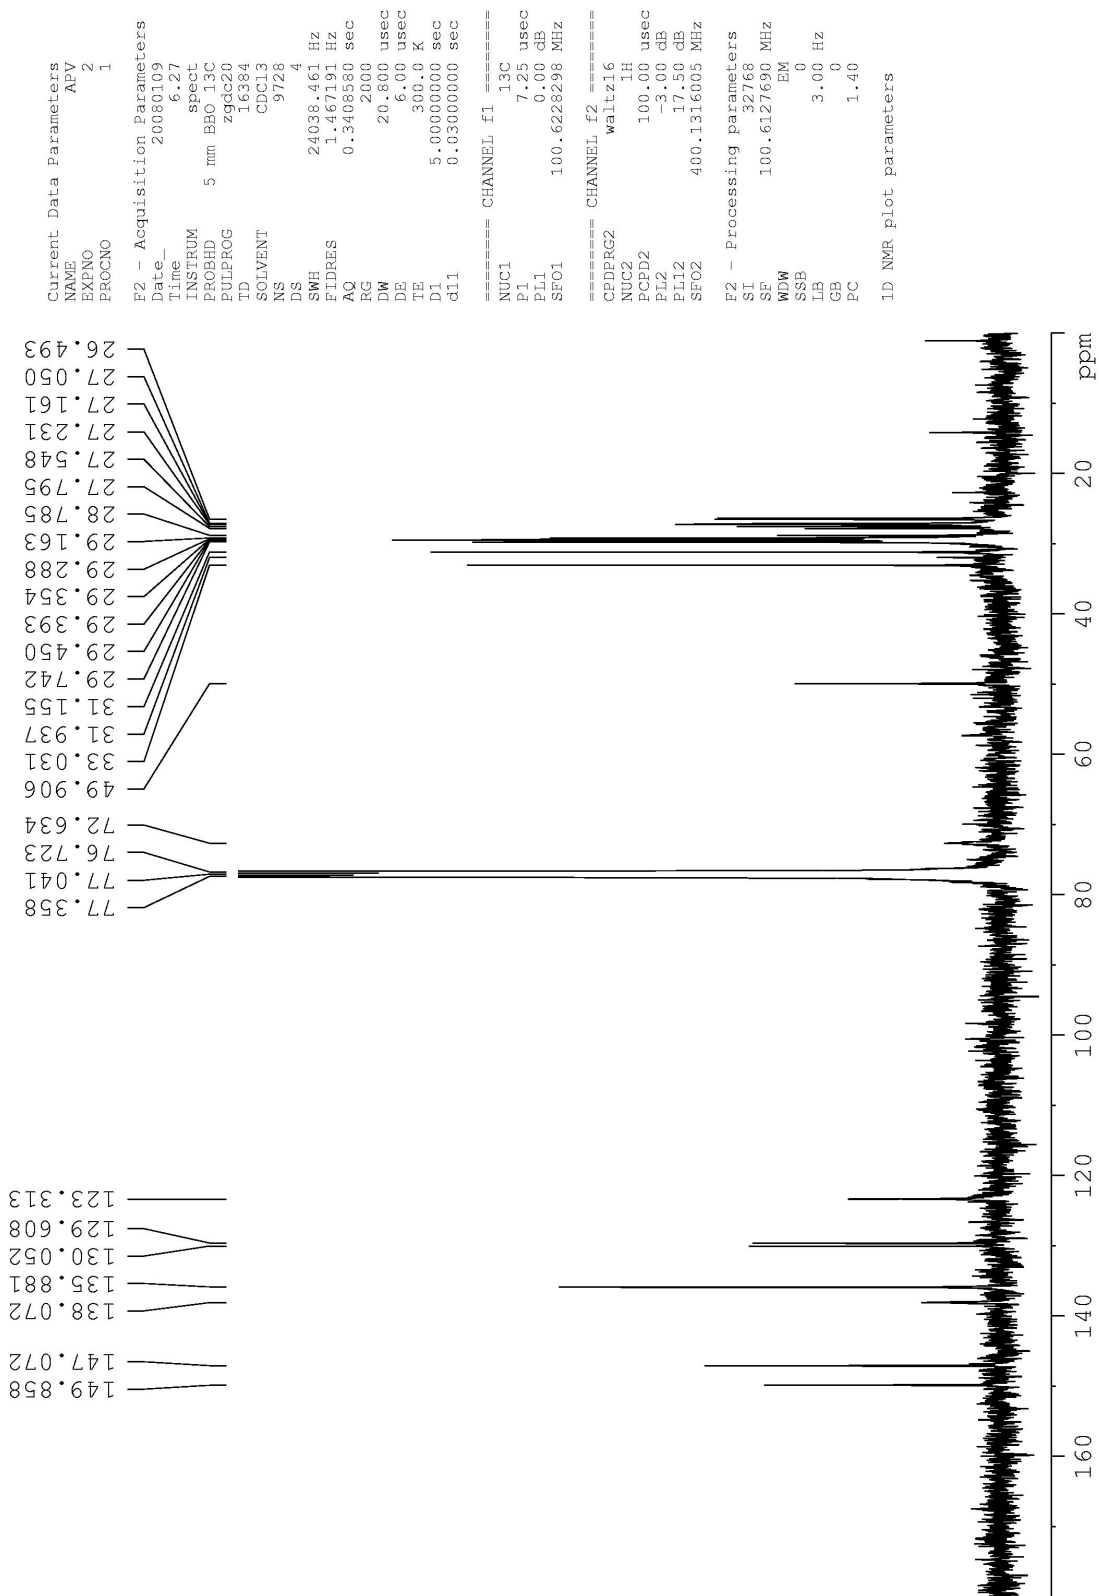

- $^{13}\text{C}$  NMR spectrum of synthetic pyrinodemin A **1** recorded at  $60^\circ\text{C}$

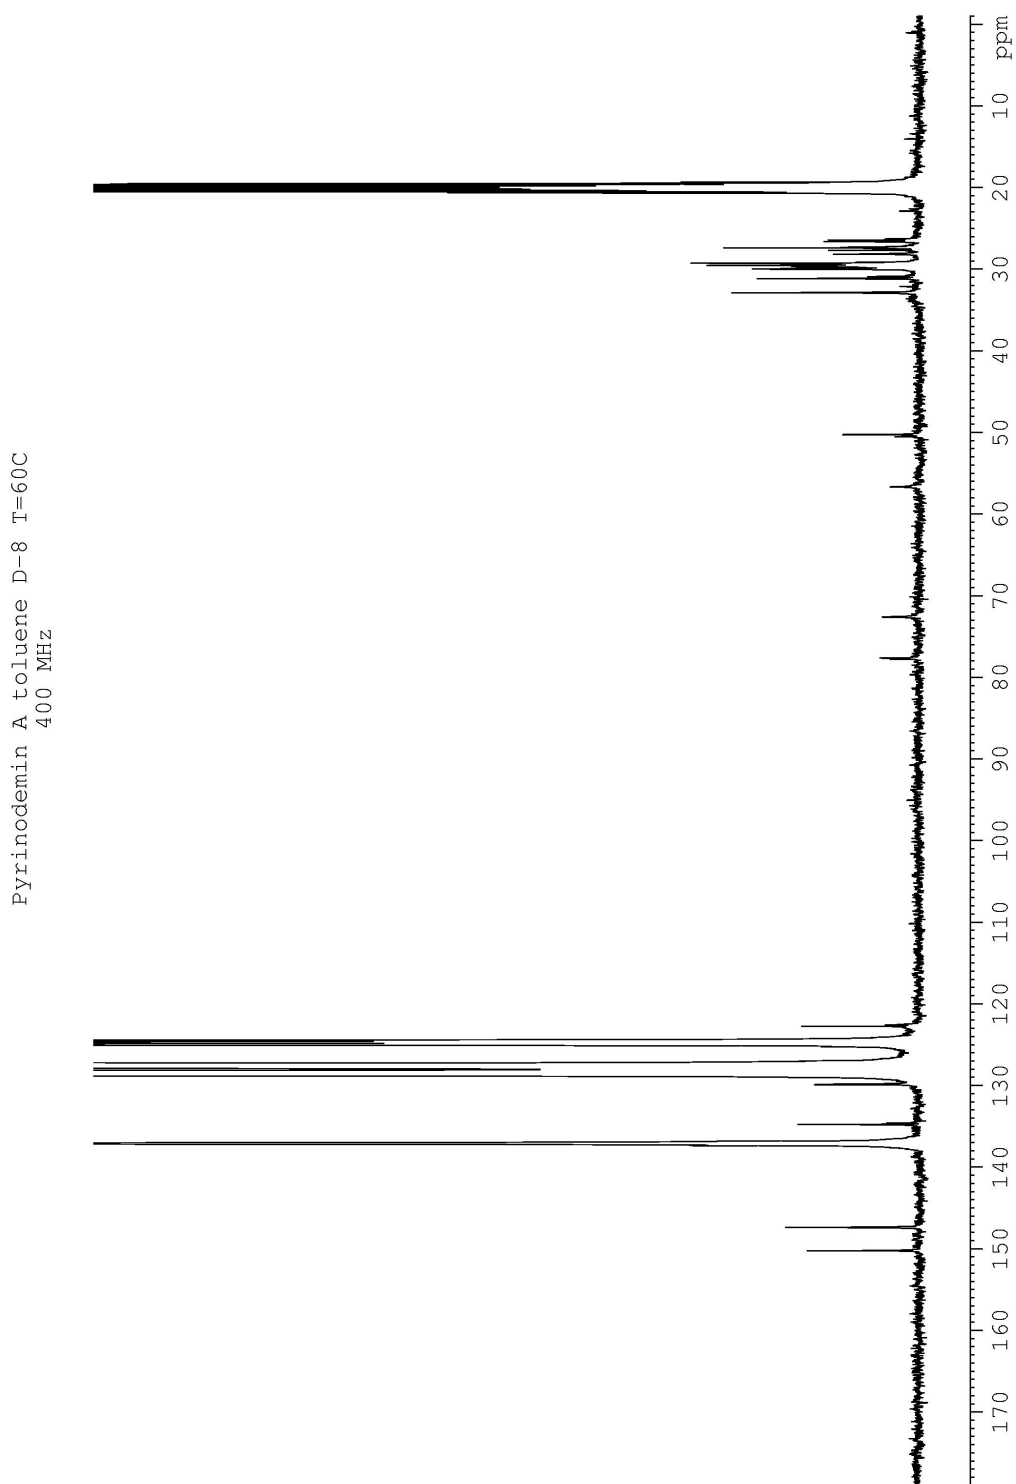

Pyridodemin A toluene D-8 T=60C  
400 MHz

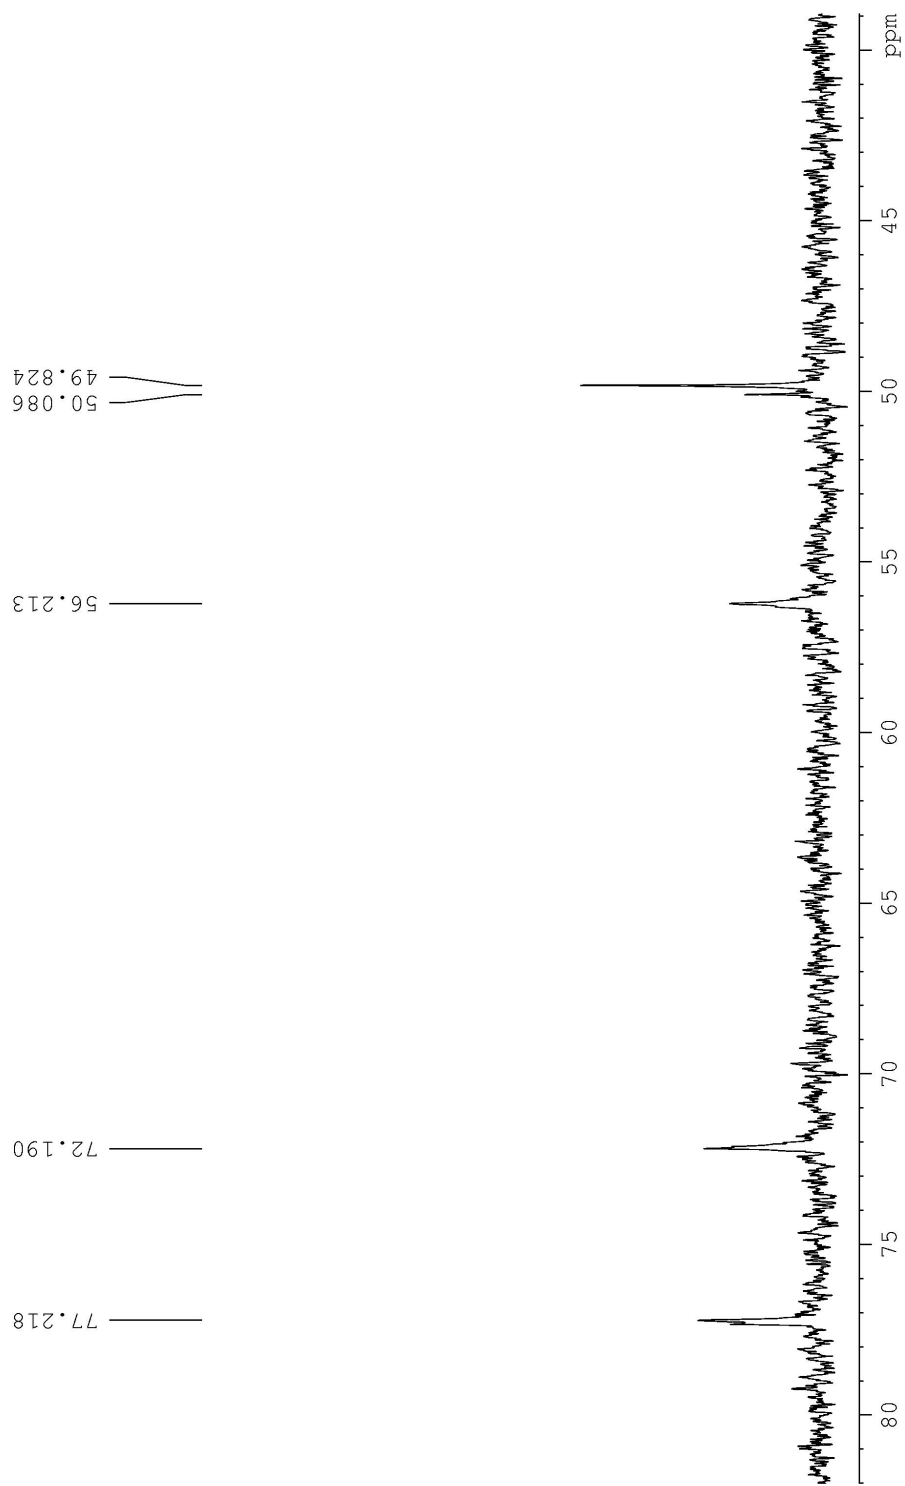

- HSQC spectrum of synthetic pyrinodemin A 1

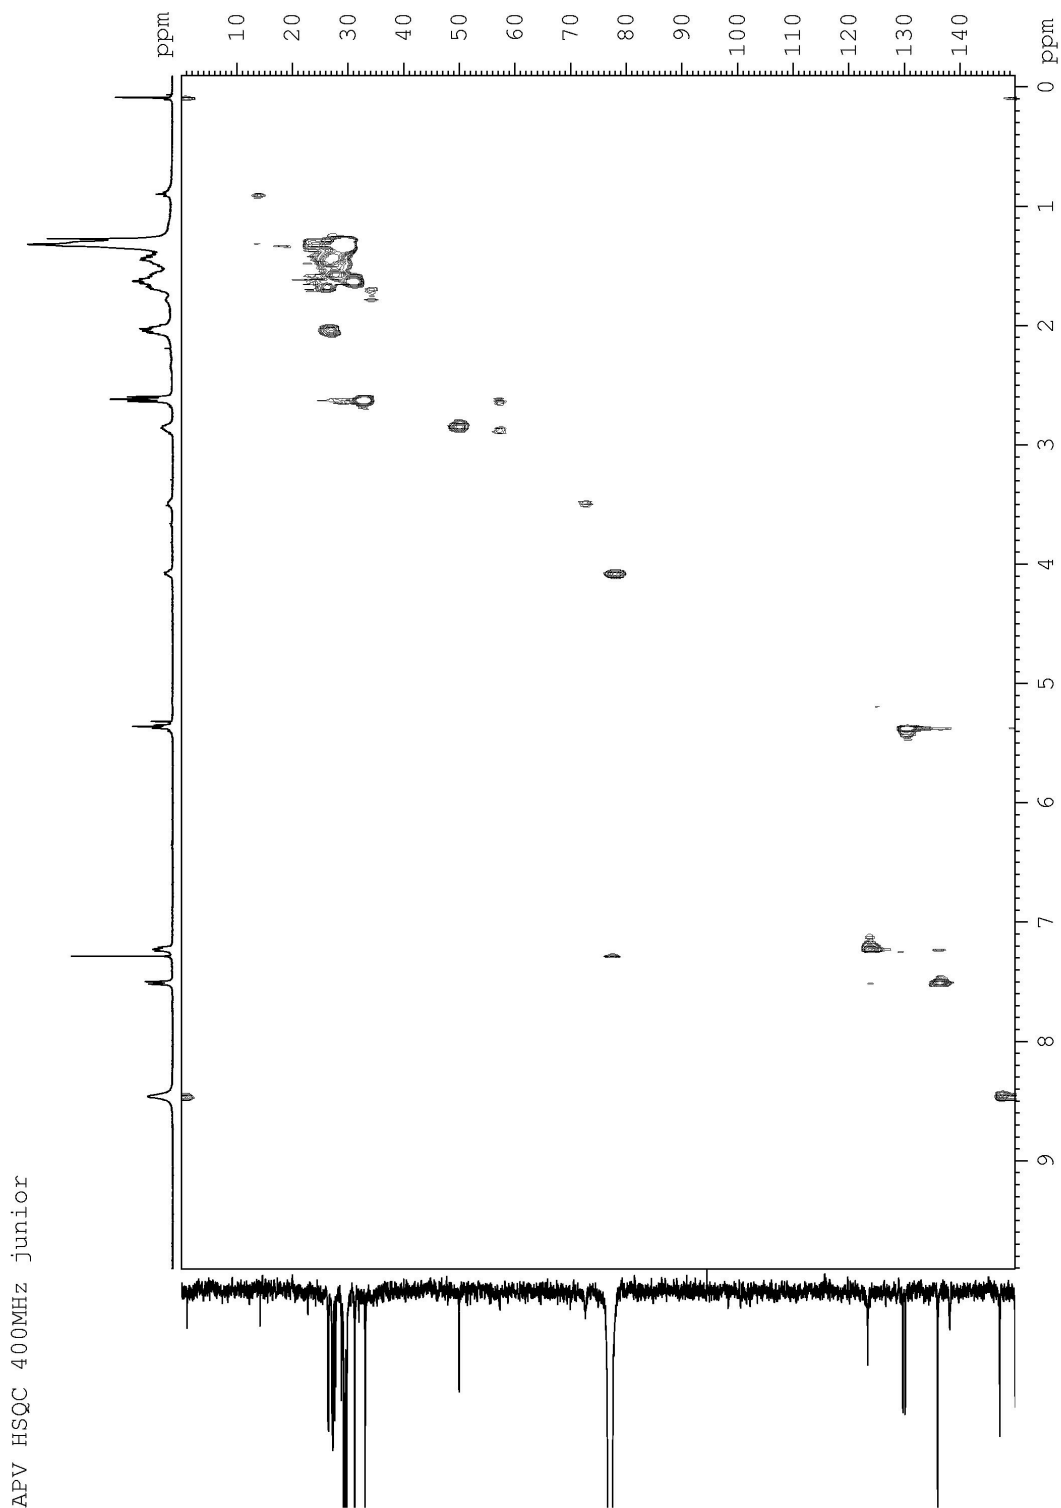

Supplement: b800840j.pdf [file b800840j.pdf]
